# Supplementary material for: Endocrine Protection of Ischemic Myocardium by FGF21 from the Liver and Adipose Tissue
Source: PubMed Central journal article supplement (PMC3783882; doi:10.1038/srep02767), 2013-09-26
Supplement: srep02767-s1.pdf [file srep02767-s1.pdf]

## Supplementary information

SREP-13-02864A

### Endocrine Protection of Ischemic Myocardium by FGF21

#### from the Liver and Adipose Tissue

Shu Q. Liu<sup>1\*</sup>, Derek Roberts<sup>1</sup>, Alexei Kharitononkov<sup>2</sup>, Brian Zhang<sup>1</sup>, Samuel M. Hanson<sup>1</sup>, Yan Chun Li<sup>3</sup>, Li-Qun Zhang<sup>4</sup>, Yu H. Wu<sup>1</sup>

<sup>1</sup>Biomedical Engineering Department, Northwestern University, Evanston, IL 60208, USA.

<sup>2</sup>Diabetes Research, Lilly Research Laboratories, Indianapolis, IN 46285, USA.

<sup>3</sup>Department of Medicine, Division of Biological Sciences, The University of Chicago, Chicago, IL 60637, USA.

<sup>4</sup>Rehabilitation Institute of Chicago, Chicago, IL 60611, USA.

Address for correspondence:

Shu Q. Liu, PhD  
Biomedical Engineering Department  
Northwestern University  
2145 Sheridan Road  
Evanston, IL 60208-3107

Phone: 847 491 5745

FAX: 847 491 4928

\* Correspondence to [[sliu@northwestern.edu](mailto:sliu@northwestern.edu)]

Supplementary Figures

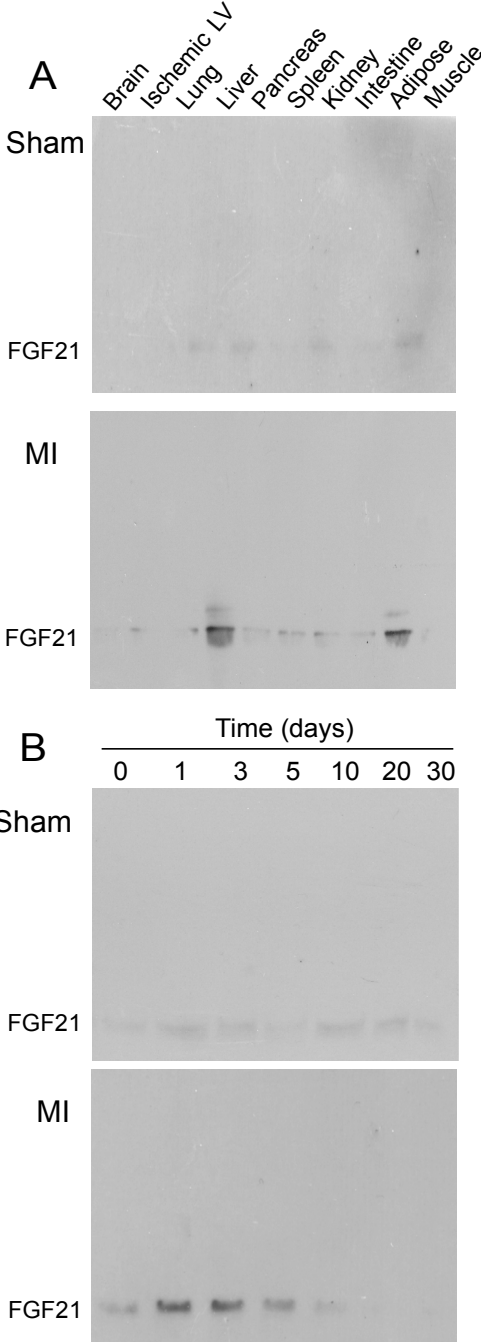

Figure 1. Original immunoblot images for Figure 1 in the main text.

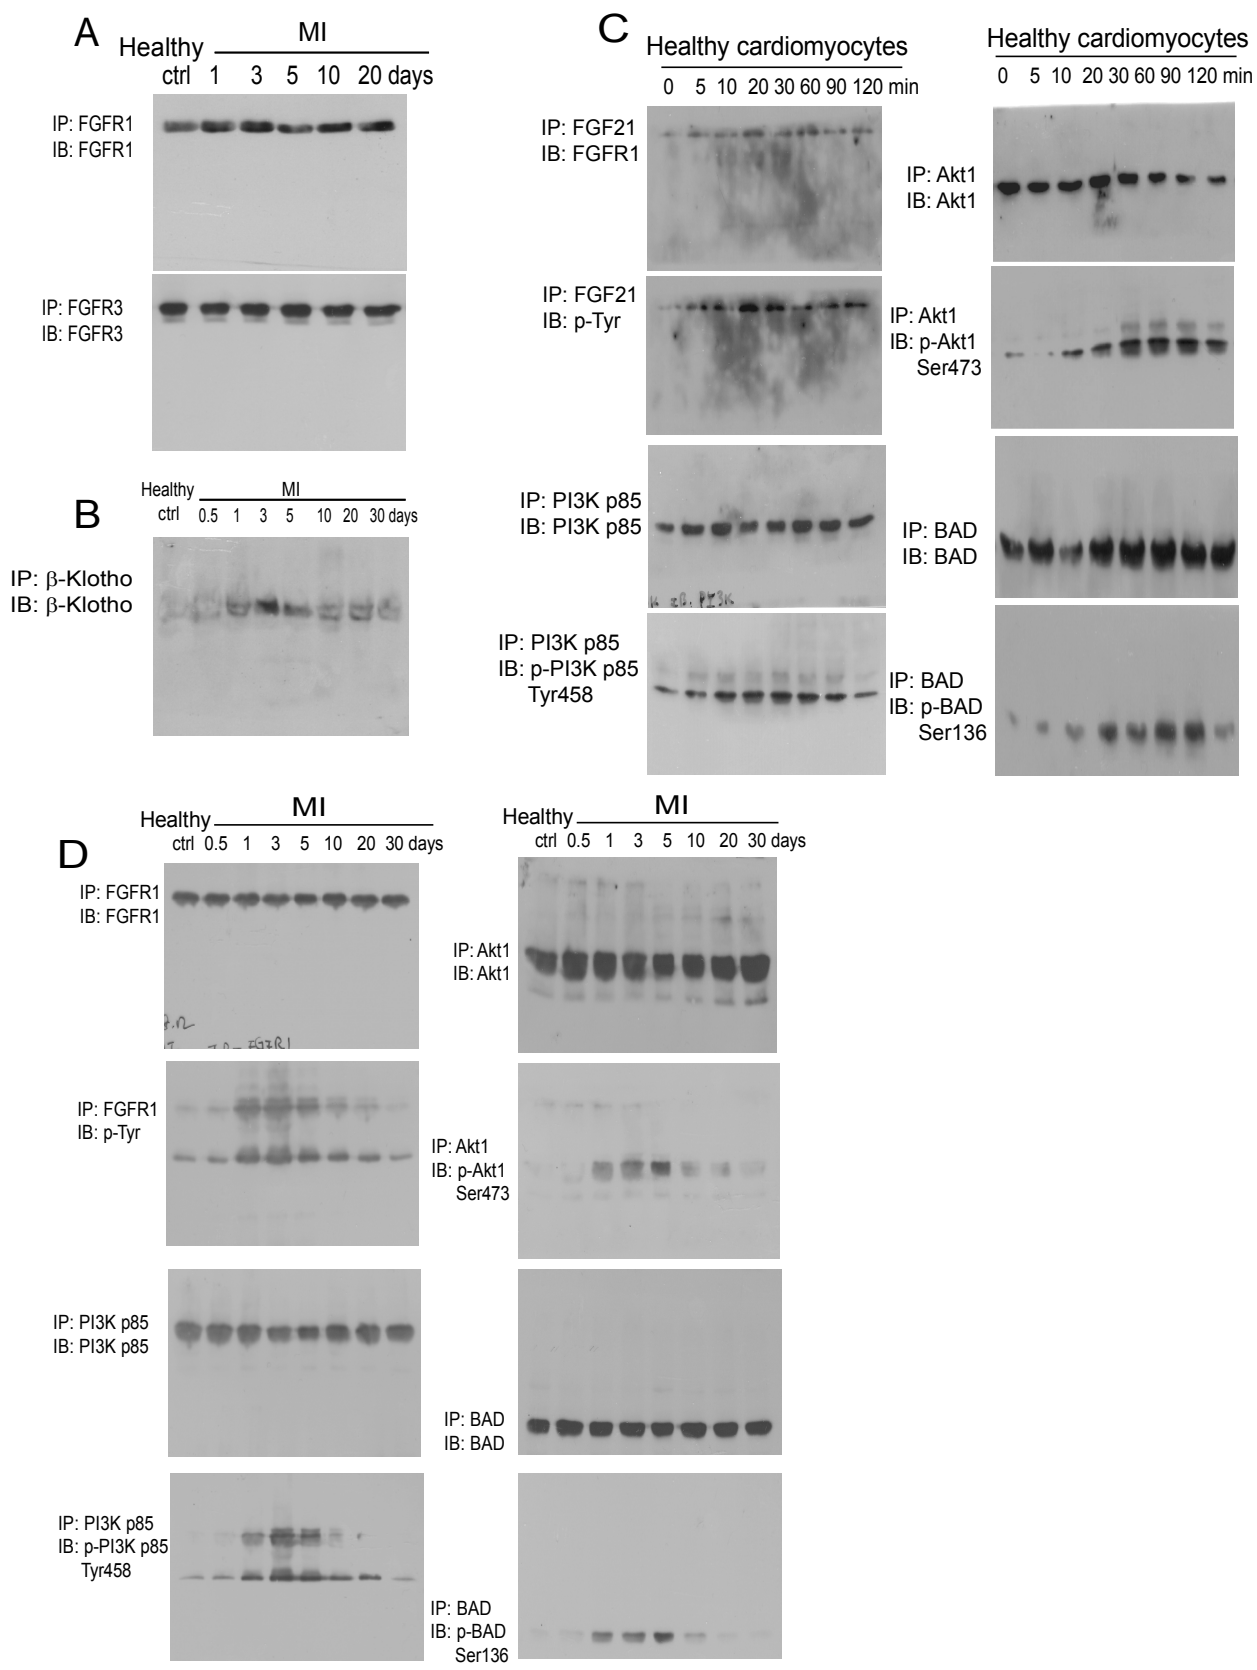

Figure 2. Original immunoblot images for Figure 2 in the main text.

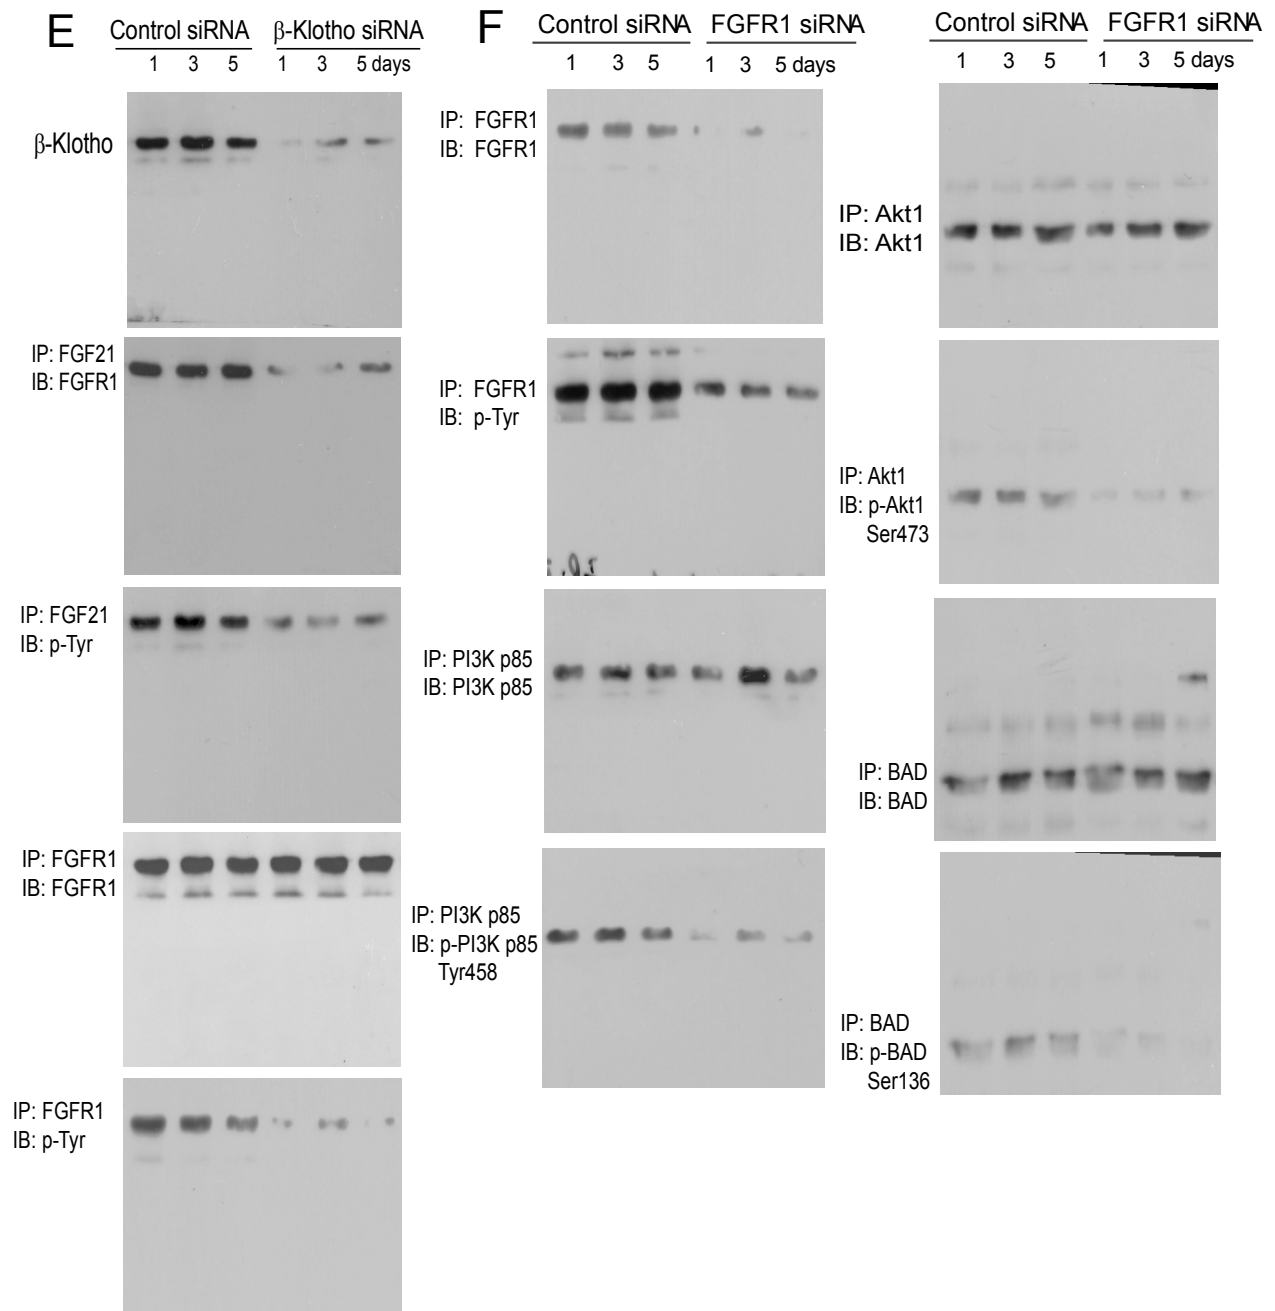

Figure 3. Original immunoblot images for Figure 3 in the main text.

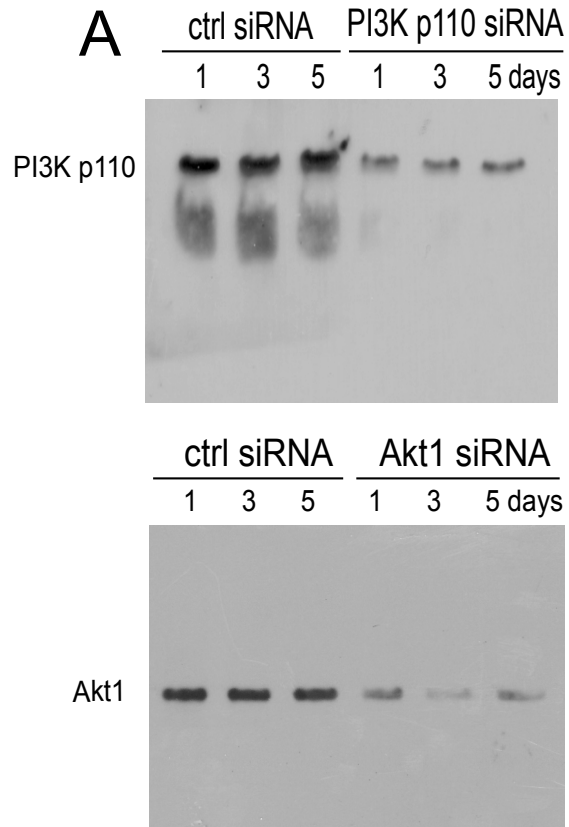

Figure 4. Original immunoblot images for Figure 7 in the main text.

## Supplementary Tables

The following tables present P values from post-hoc pairwise multiple comparisons tests by using the Tukey, Bonferroni, Fisher's least-significant-difference, and Scheffé methods for the listed parameters. The most conservative method was selected and used for difference evaluation.

**Table 1.** Caspase 3 activity in ischemic cardiomyocytes at 24 hrs. The P value from the global ANOVA test (one-way) is < 0.0001.

| Treatments | P values |            |          |          |
|------------|----------|------------|----------|----------|
|            | Tukey    | Bonferroni | Fisher's | Scheffé  |
| a vs. b    | < 0.0001 | < 0.0001   | < 0.0001 | < 0.0001 |
| a vs. c    | < 0.0001 | < 0.0001   | < 0.0001 | < 0.0001 |
| a vs. d    | < 0.0001 | < 0.0001   | < 0.0001 | < 0.0001 |
| b vs. c    | < 0.005  | < 0.005    | < 0.002  | < 0.01   |
| b vs. d    | > 0.5    | > 0.5      | > 0.5    | > 0.5    |
| c vs. d    | < 0.002  | < 0.002    | < 0.0001 | < 0.005  |

The letters a, b, c, and d represent wild-type sham controls, wild-type myocardial injury (MI), FGF21<sup>-/-</sup> MI with PBS administration, and FGF21<sup>-/-</sup> MI with FGF21 administration, respectively.

**Table 2.** Fraction of TUNEL-positive cell nuclei in the ischemic myocardium at 24 hrs. The P value from the global ANOVA test (one-way) is < 0.0001.

| Treatments | P values |            |          |          |
|------------|----------|------------|----------|----------|
|            | Tukey    | Bonferroni | Fisher's | Scheffé  |
| a vs. b    | < 0.0001 | < 0.0001   | < 0.0001 | < 0.0001 |
| a vs. c    | < 0.0001 | < 0.0001   | < 0.0001 | < 0.0001 |
| a vs. d    | < 0.0001 | < 0.0001   | < 0.0001 | < 0.0001 |
| b vs. c    | < 0.0001 | < 0.0001   | < 0.0001 | < 0.0001 |
| b vs. d    | < 0.002  | < 0.005    | < 0.0001 | < 0.005  |
| c vs. d    | < 0.0001 | < 0.0001   | < 0.0001 | < 0.0001 |

The letters a, b, c, and d represent wild-type sham controls, wild-type myocardial injury (MI), FGF21<sup>-/-</sup> MI with PBS administration, and FGF21<sup>-/-</sup> MI with FGF21 administration, respectively.

**Table 3.** Fraction of acute myocardial infarcts in reference to the area at risk at 24 hrs. The P value from the global ANOVA test (one-way) is < 0.001.

| Treatments | P values |            |          |          |
|------------|----------|------------|----------|----------|
|            | Tukey    | Bonferroni | Fisher's | Scheffé  |
| a vs. b    | < 0.02   | < 0.02     | < 0.005  | < 0.02   |
| a vs. c    | < 0.5    | < 0.5      | < 0.2    | < 0.5    |
| b vs. c    | < 0.0001 | < 0.0001   | < 0.0001 | < 0.0001 |

The letters a, b, and c represent wild-type myocardial injury (MI), FGF21<sup>-/-</sup> MI with PBS administration, and FGF21<sup>-/-</sup> MI with FGF21 administration, respectively.

**Table 4.** Fraction of myocardial infarcts at 5, 10, and 30 days.

Table 4.1. Multiple comparisons in reference to times. The P value from the global ANOVA test (two-way) is < 0.0001.

| Times (days) | P values |            |          |          |
|--------------|----------|------------|----------|----------|
|              | Tukey    | Bonferroni | Fisher's | Scheffé  |
| 5 vs. 10     | < 0.0001 | < 0.0001   | < 0.0001 | < 0.0001 |
| 5 vs. 30     | < 0.0001 | < 0.0001   | < 0.0001 | < 0.0001 |
| 10 vs. 30    | < 0.0001 | < 0.0001   | < 0.0001 | < 0.0001 |

Table 4.2. Multiple comparisons in reference to treatments. The P value from the global ANOVA test (two-way) is < 0.0001.

| Treatments | P values |            |          |          |
|------------|----------|------------|----------|----------|
|            | Tukey    | Bonferroni | Fisher's | Scheffé  |
| a vs. b    | < 0.02   | < 0.02     | < 0.01   | < 0.05   |
| a vs. c    | < 0.0001 | < 0.0001   | < 0.0001 | < 0.0001 |
| c vs. d    | < 0.02   | < 0.02     | < 0.01   | < 0.02   |

The letters a, b, and c represent wild-type myocardial injury (MI), FGF21<sup>-/-</sup> MI with PBS administration, and FGF21<sup>-/-</sup> MI with FGF21 administration, respectively.

**Table 5.** Left ventricular (LV) dp/dt and -dp/dt (absolute value) at 1, 5, 10, and 30 days.

Table 5.1. Multiple comparisons in LV dp/dt in reference to times. The P value from the global ANOVA test (two-way) is  $> 0.5$ .

| Times<br>(days) | P values |            |          |         |
|-----------------|----------|------------|----------|---------|
|                 | Tukey    | Bonferroni | Fisher's | Scheffé |
| 1 vs. 5         | $> 0.5$  | $> 0.5$    | $> 0.5$  | $> 0.5$ |
| 1 vs. 10        | $> 0.5$  | $> 0.5$    | $> 0.5$  | $> 0.5$ |
| 1 vs. 30        | $> 0.5$  | $> 0.5$    | $< 0.5$  | $> 0.5$ |
| 5 vs. 10        | $> 0.5$  | $> 0.5$    | $> 0.5$  | $> 0.5$ |
| 5 vs. 30        | $> 0.5$  | $> 0.5$    | $< 0.5$  | $> 0.5$ |
| 10 vs. 30       | $> 0.5$  | $> 0.5$    | $> 0.5$  | $> 0.5$ |

Table 5.2. Multiple comparisons in LV dp/dt in reference to treatments. The P value from the global ANOVA test (two-way) is  $< 0.0001$ .

| Treatments | P values   |            |            |            |
|------------|------------|------------|------------|------------|
|            | Tukey      | Bonferroni | Fisher's   | Scheffé    |
| a vs. b    | $< 0.0001$ | $< 0.0001$ | $< 0.0001$ | $< 0.0001$ |
| a vs. c    | $< 0.0001$ | $< 0.0001$ | $< 0.0001$ | $< 0.0001$ |
| a vs. d    | $< 0.0001$ | $< 0.0001$ | $< 0.0001$ | $< 0.0001$ |
| b vs. c    | $< 0.0001$ | $< 0.0001$ | $< 0.0001$ | $< 0.0001$ |
| b vs. d    | $< 0.0001$ | $< 0.0001$ | $< 0.0001$ | $< 0.0001$ |
| c vs. d    | $< 0.0001$ | $< 0.0001$ | $< 0.0001$ | $< 0.0001$ |

The letters a, b, c, and d represent wild-type sham controls, wild-type myocardial injury (MI), FGF21<sup>-/-</sup> MI with PBS administration, and FGF21<sup>-/-</sup> MI with FGF21 administration, respectively.



Table 5.3 Multiple comparisons in LV  $-dp/dt$  in reference to times. The P value from the global ANOVA test (two-way) is  $> 0.5$ .

| Times<br>(days) | P values |            |          |         |
|-----------------|----------|------------|----------|---------|
|                 | Tukey    | Bonferroni | Fisher's | Scheffé |
| 1 vs. 5         | $> 0.5$  | $> 0.5$    | $> 0.5$  | $> 0.5$ |
| 1 vs. 10        | $> 0.5$  | $> 0.5$    | $> 0.5$  | $> 0.5$ |
| 1 vs. 30        | $> 0.5$  | $> 0.5$    | $> 0.5$  | $> 0.5$ |
| 5 vs. 10        | $> 0.5$  | $> 0.5$    | $> 0.5$  | $> 0.5$ |
| 5 vs. 30        | $> 0.5$  | $> 0.5$    | $> 0.5$  | $> 0.5$ |
| 10 vs. 30       | $> 0.5$  | $> 0.5$    | $> 0.5$  | $> 0.5$ |

Table 5.4. Multiple comparisons in LV  $-dp/dt$  in reference to treatments. The P value from the global ANOVA test (two-way) is  $< 0.0001$ .

| Treatments | P values   |            |            |            |
|------------|------------|------------|------------|------------|
|            | Tukey      | Bonferroni | Fisher's   | Scheffé    |
| a vs. b    | $< 0.0001$ | $< 0.0001$ | $< 0.0001$ | $< 0.0001$ |
| a vs. c    | $< 0.0001$ | $< 0.0001$ | $< 0.0001$ | $< 0.0001$ |
| a vs. d    | $< 0.0001$ | $< 0.0001$ | $< 0.0001$ | $< 0.0001$ |
| b vs. c    | $< 0.01$   | $< 0.01$   | $< 0.002$  | $< 0.02$   |
| b vs. d    | $< 0.0001$ | $< 0.0001$ | $< 0.0001$ | $< 0.0001$ |
| c vs. d    | $< 0.0001$ | $< 0.0001$ | $< 0.0001$ | $< 0.0001$ |

The letters a, b, c, and d represent wild-type sham controls, wild-type myocardial injury (MI), FGF21<sup>-/-</sup> MI with PBS administration, and FGF21<sup>-/-</sup> MI with FGF21 administration, respectively.

**Table 6.** Fractional shortening of the left ventricle at 1, 5, 10, and 30 days.

Table 6.1. Multiple comparisons in reference to times. The P value from the global ANOVA test (two-way) is  $< 0.1$ .

| Times<br>(days) | P values |            |          |         |
|-----------------|----------|------------|----------|---------|
|                 | Tukey    | Bonferroni | Fisher's | Scheffé |
| 1 vs. 5         | $> 0.5$  | $> 0.5$    | $< 0.5$  | $> 0.5$ |
| 1 vs. 10        | $> 0.5$  | $> 0.5$    | $< 0.5$  | $> 0.5$ |
| 1 vs. 30        | $< 0.5$  | $> 0.5$    | $< 0.2$  | $> 0.5$ |
| 5 vs. 10        | $< 0.5$  | $< 0.5$    | $< 0.1$  | $< 0.5$ |
| 5 vs. 30        | $< 0.2$  | $< 0.2$    | $< 0.05$ | $< 0.2$ |
| 10 vs. 30       | $> 0.5$  | $> 0.5$    | $> 0.5$  | $> 0.5$ |

Table 6.2. Multiple comparisons in reference to treatments. The P value from the global ANOVA test (two-way) is  $< 0.0001$ .

| Treatments | P values   |            |            |            |
|------------|------------|------------|------------|------------|
|            | Tukey      | Bonferroni | Fisher's   | Scheffé    |
| a vs. b    | $< 0.0001$ | $< 0.0001$ | $< 0.0001$ | $< 0.0001$ |
| a vs. c    | $< 0.0001$ | $< 0.0001$ | $< 0.0001$ | $< 0.0001$ |
| a vs. d    | $< 0.0001$ | $< 0.0001$ | $< 0.0001$ | $< 0.0001$ |
| b vs. c    | $< 0.0001$ | $< 0.0001$ | $< 0.0001$ | $< 0.0001$ |
| b vs. d    | $< 0.0001$ | $< 0.0001$ | $< 0.0001$ | $< 0.0001$ |
| c vs. d    | $< 0.0001$ | $< 0.0001$ | $< 0.0001$ | $< 0.0001$ |

The letters a, b, c, and d represent wild-type sham controls, wild-type myocardial injury (MI), FGF21<sup>-/-</sup> MI with PBS administration, and FGF21<sup>-/-</sup> MI with FGF21 administration, respectively.

**Table 7.** Influence of siRNA-mediated FGFR1,  $\beta$ -Klotho, PI3K p110, or Akt1 gene silencing on the fraction of myocardial infarcts at day 5. The P value from the global ANOVA test (one-way) is  $< 0.005$ .

| Treatments | P values  |            |            |           |
|------------|-----------|------------|------------|-----------|
|            | Tukey     | Bonferroni | Fisher's   | Scheffé   |
| a vs. b    | $< 0.01$  | $< 0.01$   | $< 0.002$  | $< 0.05$  |
| a vs. c    | $< 0.1$   | $< 0.2$    | $< 0.02$   | $< 0.2$   |
| a vs. d    | $< 0.002$ | $< 0.002$  | $< 0.0001$ | $< 0.005$ |
| a vs. e    | $< 0.01$  | $< 0.01$   | $< 0.002$  | $< 0.05$  |
| b vs. c    | $> 0.5$   | $> 0.5$    | $< 0.5$    | $> 0.5$   |
| b vs. d    | $> 0.5$   | $> 0.5$    | $> 0.5$    | $> 0.5$   |
| b vs. e    | $> 0.5$   | $> 0.5$    | $> 0.5$    | $> 0.5$   |
| c vs. d    | $< 0.5$   | $> 0.5$    | $< 0.2$    | $> 0.5$   |
| c vs. e    | $> 0.5$   | $> 0.5$    | $< 0.5$    | $> 0.5$   |
| d vs. e    | $> 0.5$   | $> 0.5$    | $> 0.5$    | $> 0.5$   |

The letters a, b, c, d, and e represent control, FGFR1,  $\beta$ -Klotho, PI3K p110, and Akt1 siRNA treatments, respectively.
